# Supplementary material for: The genetic prehistory of the Baltic Sea region
Source: Springer Nature journal article supplement (doi:10.1038/s41467-018-02825-9), 2018-01-24
Supplement: 41467_2018_2825_MOESM3_ESM.pdf [file 41467_2018_2825_MOESM3_ESM.pdf]

## **Description of Supplementary Files**

File Name: Supplementary Data 1

Description: Overview of sample information. Tabular compilation of archaeological information, processing strategy and results for all analysed samples and corresponding experimental blanks.
